# Supplementary material for: 5-Bromo-3,4-dihydroxybenzaldehyde Promotes Hair Growth through Activation of Wnt/β-Catenin and Autophagy Pathways and Inhibition of TGF-β Pathways in Dermal Papilla Cells
Source: MDPI journal article supplement (doi:10.3390/molecules27072176), 2022-03-28
Supplement: s1 [file s1]

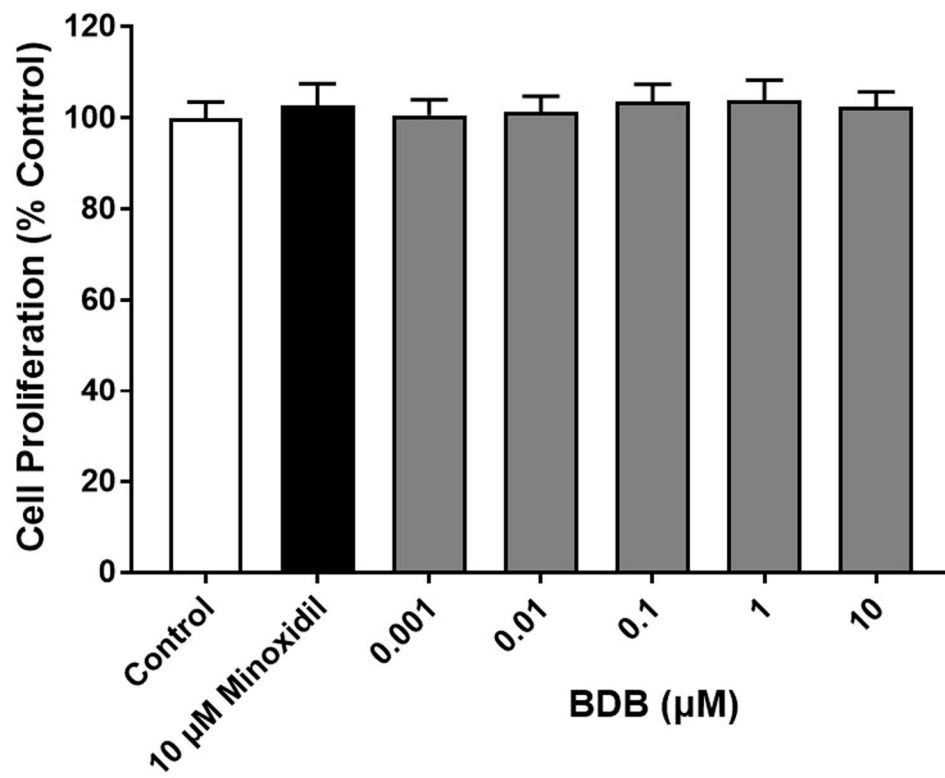

**Supplementary Figure S1. Effects of BDB on the proliferation of DPCs.** DPC proliferation stimulated using various concentrations of BDB or minoxidil for 24 h. Data are presented as mean  $\pm$  SD.

**Supplementary Table S1.** List of antibodies used for immunoblotting.

| <b>Antibodies</b>                  | <b>Supplier</b> | <b>Species</b> | <b>Dilution</b> |
|------------------------------------|-----------------|----------------|-----------------|
| phospho-(ser552)- $\beta$ -catenin | Cell Signaling  | Rabbit         | 1:1000          |
| phospho-(ser675)- $\beta$ -catenin | Cell Signaling  | Rabbit         | 1:1000          |
| $\beta$ -catenin                   | Santa Cruz      | Rabbit         | 1:2000          |
| phospho-(ser9)-GSK3 $\beta$        | Cell Signaling  | Rabbit         | 1:1000          |
| Cyclin E                           | Santa Cruz      | Rabbit         | 1:1000          |
| Cyclin D1                          | BD Biosciences  | Mouse          | 1:1000          |
| Phospho-(Thr160)-CDK2              | Cell Signaling  | Rabbit         | 1:1000          |
| CDK2                               | Santa Cruz      | Rabbit         | 1:1000          |
| Smad2/3                            | Santa Cruz      | Mouse          | 1:1000          |
| Phospho-Smad2                      | Cell Signaling  | Rabbit         | 1:1000          |
| Phospho-Smad3                      | Cell Signaling  | Rabbit         | 1:1000          |
| Atg7                               | Cell Signaling  | Rabbit         | 1:1000          |
| LC3A/B                             | Cell Signaling  | Rabbit         | 1:1000          |
| Atg5                               | Cell Signaling  | Rabbit         | 1:1000          |
| Atg16L                             | Cell Signaling  | Rabbit         | 1:1000          |
| Lamin B1                           | Abcam           | Rabbit         | 1:2000          |
| $\beta$ -Actin                     | Sigma-Aldrich   | Mouse          | 1:5000          |
